# Supplementary material for: Effect of High Hydrostatic Pressure Processing on the Microbiological Quality and Bacterial Diversity of Sous-Vide-Cooked Cod
Source: MDPI journal article supplement (doi:10.3390/foods12061206), 2023-03-12
Supplement: s1 [file s1]

**Supplementary Table S1.** Number of assigned reads and alpha diversity indexes determined at genus level of controls (C) and pressurized (P) samples. PA (300 MPa, 8 min., 50 °C); PB (600 MPa, 4 min., 50 °C); PC (600 MPa, 8 min., 22 °C); PD (600 MPa, 8 min., 50 °C).

| Sample | Nº reads | CHAO1 | Shannon | Simpson |
|--------|----------|-------|---------|---------|
| C0     | 57650    | 69    | 2.67    | 0.89    |
| C3     | 83152    | 67    | 2.32    | 0.83    |
| C7     | 105751   | 33    | 0.36    | 0.12    |
| C14    | 91869    | 14    | 0.82    | 0.45    |
| C30    | 102818   | 21    | 1.59    | 0.73    |
| C60    | 85408    | 14    | 1.47    | 0.72    |
| PA3    | 80123    | 80    | 2.76    | 0.91    |
| PA7    | 64749    | 68    | 2.10    | 0.77    |
| PA14   | 48361    | 70    | 2.53    | 0.87    |
| PA30   | 77803    | 63    | 2.57    | 0.89    |
| PA45   | 98955    | 31    | 0.73    | 0.43    |
| PA60   | 89039    | 17    | 1.11    | 0.62    |
| PA75   | 90091    | 21    | 0.73    | 0.42    |
| PA90   | 80582    | 16    | 0.74    | 0.47    |
| PA105  | 83397    | 11    | 0.13    | 0.04    |
| PB3    | 37162    | 82    | 2.67    | 0.88    |
| PB7    | 84481    | 92    | 2.44    | 0.84    |
| PB14   | 60180    | 85    | 2.31    | 0.8     |
| PB30   | 68849    | 97    | 2.75    | 0.9     |
| PB45   | 107646   | 45    | 1.30    | 0.52    |
| PB60   | 95428    | 20    | 0.97    | 0.54    |
| PB75   | 105106   | 33    | 1.24    | 0.53    |
| PB90   | 65624    | 17    | 0.48    | 0.27    |
| PB105  | 86020    | 14    | 0.42    | 0.2     |
| PC3    | 76095    | 83    | 2.53    | 0.87    |
| PC7    | 72866    | 68    | 2.38    | 0.86    |
| PC14   | 51027    | 88    | 2.51    | 0.85    |
| PC30   | 78121    | 59    | 2.08    | 0.82    |
| PC45   | 43784    | 60    | 2.50    | 0.88    |
| PC60   | 90508    | 36    | 0.65    | 0.23    |
| PC75   | 64176    | 55    | 2.39    | 0.87    |
| PC90   | 64318    | 44    | 2.26    | 0.85    |
| PC105  | 69903    | 25    | 0.85    | 0.47    |
| PD3    | 49311    | 66    | 2.56    | 0.87    |
| PD7    | 73380    | 85    | 2.54    | 0.88    |
| PD14   | 57243    | 78    | 2.10    | 0.76    |
| PD30   | 69923    | 62    | 2.54    | 0.88    |
| PD45   | 74970    | 76    | 2.27    | 0.83    |
| PD60   | 129557   | 14    | 0.25    | 0.09    |

|       |       |    |      |      |
|-------|-------|----|------|------|
| PD75  | 87593 | 15 | 0.05 | 0.01 |
| PD90  | 49819 | 32 | 1.24 | 0.48 |
| PD105 | 76186 | 17 | 0.19 | 0.06 |

---
